# Supplementary material for: Kdm4d mutant mice show impaired sperm motility and subfertility
Source: PubMed Central journal article supplement — J Reprod Dev. 2024 Jul 22;70(5):320–6. doi: 10.1262/jrd.2024-039 (PMC11461516; doi:10.1262/jrd.2024-039), 2024-07-22
Supplement: jrd-70-320-s001.pdf [file jrd-70-320-s001.pdf]

**Supplementary Fig. 1.**

**DNA sequences of the Kdm4dl knockout allele.**

The gRNA target sequences and start codons are indicated in blue and green, respectively.

**Supplementary Fig. 2,**

**DNA sequences of the Kdm4d knockout allele.**

The gRNA target sequences and start codons are indicated in blue and green, respectively.

## Supplementary Fig. 1

### Kdm4dl locus (Wild-type)

CAGTTTTTCCATCCTGTGTACCTTCCAATTAGAAGGCAAGGGGCAGAGCCAGCGGTGGTGGTACACGCCTTTAATCCCAGCACTT  
GGGAGGCAGAGGCAGGCGGATTTCTGAGTTTGAGGCCAGCCTGCTCTACAAAGTGAGTTCCTGGACAGCCAGGGCTACACAGAGA  
AACACTTTCTCAAAAACAAAACAAAACAAAACAAAACAAAACAAAACAAAACAAAACAAAACAAAACAAAACAAAACAAAAGGAAGGGGT  
CTGAGCCTCCCCAATCCCATACAGTGACCAAGGGGGACCAAGCGTGTGGGAATCAAGTGAGTGCTCCAGGAGTGGTACAGGG  
ACTGTGCTTCATAGAAGCTGTTTTTCAAGGTAAAAGTCTGAGCAAGAAGAGGATGCCTGGGAAATCAAGCCAGCAAGGCTTC  
TCTTTCTTACATTTTCTGTCTTTTCTTTTATTATAGAGATTGGAAGGGTCTTGCTACATAGATAAGGGGCTGCTCATACTG  
TTAGTCTCCTGAGAGCCATATTTAATCTTTAAAATGTTATCTTGTCCACCAGGAAACAAAACCATAGGAAAAGAAAAGAAAGGAA  
CGAAAGAAAGAACTTAAGGACAGATAAGAGACTGAAGAAAATCCAACAGGAAGGCAGGGGAAGCTTACACAGAGAGAGACTAAAA  
GGTTCCTCTGAAAAGCCCAAAGCTCCAGACAGTCAGGACCCAGGCTGAGCTCCTGAATTGCTGTGGCCATGACAGCCACTGAGC  
AGGATGGGTCCCAGAACCAGGCTGTACAATCATGACCTTCTGCCAAACATGGAAGAGTTCCTCAGACTTCAACAAATACATTGC  
CTACATGGAGTCCCAAGGAGCACACCGAGCTGGACTGGCCAAGTGCATCCCACCAAGGAGTGGAAAGGCAGGCTGTCTATGAG  
GATGTGATGGCTATGGCAATCCCCTGAGCAAGTGGTCTCTGGGCAGGCAGGCGTGTTCACCAATACCATAAGAAGA  
AGAAAGGCATGACAGTGGGGAGTATCGTGAGCTGGCCGACAGCAAAAAGTACCAGACCCACACCTGGATTTTGAAGATTT  
GGAGCGAAAATACTGGAAGAATCGCCTGTTTGGGTACCGATTTATGGTGTGACGTCAGCGGCTCCCTGTTTGGTGAGAACACT  
CAACATTTGGAACATGGCCATCTGGGAAGCCTTTTGGATGTGTTGAAGCAGGATCACGACATAGTGATTGAGGGTGTCAACACGC  
CCTACCTGTACTTTGGCATGTGGAAGACCACCTTTGCGTGGCACACGGAGGACATGGACCTGTACAGTATCAACTACCTACACTT  
TGGGCAGCCCAAGACCTGGTATGCTGTGCCCCCTGAGCATGGCAGGCGCTGGAGCGCTGGCCAGGGAACCTTTCCCTGGCAGC  
TCCCAGGGCTGCCAGGCTTCTGAGGCACAAGGTGGCGCTCATCTCACCCACTGTGCTTAAGGAGAATGGCATCCCTTTGGTC  
GCATACCCAGGAGGCTGGGGAGTTTATGGTCACTTTCCCTATGGCTACCACGCAGGCTTCAACCATGGCTTCAACTGCGCAGA  
GGCCATCAATTTTGGCACCCTAAGGTGGATTGACTATGGCAAGGTGGCATCTCAGTGCAGCTGTGGGGAGGCCAGGGTGAAGCTTC  
TCCATGGACGCCTTTGAAGGCCTCCTGACGCTGAGAGCTATGAGCTGTGGAACAGCAAGGGGATCCTGGAGCTATGGACCACC  
TGGAGCTCACCTCCTGCCCTGGGAAGGAGCTGACCCCTGGGACCTACACACTGGATCAAGGGAAGCCCACTTCAACCCGGAGGCA  
TTACCATTGGGACCCCTCAGGAGTGGGTGAGCAGAGGCCACAACAGCTGTCTTACACAAAGGTGCCCTCAAAGTCCCTGTAC  
CTTTTCCATTACAGGCTTTTGGCTCCTCAATCTACTCCGCAAGGGACAGGATCTCCAAGCAAGCTTCTGGAGCTCTGGGATCC  
CTGTGATCCTGTTAATGTTATAGCTGTGAACTACCCACAGGCTGTAGAATCTTGATAGGAGCCCCAAGTCTCCCTGCCGCTC  
ACGGTGGTGGACATGAACTAAGTACATGCAGGATCACCTCCCAAGTCTGAGGCCATTTGGTCACAAGTGGATATTCCTGATCACT  
TGGACAAACAGGTGTCCAAGTTGTTGACAAATCAAACCTCCTTTGGATGATGCATTTGAGTCTCCTTTTGGTTTGGCCAGGATC  
TCCTTCAGAATTCATGCAGAAGGTGGATCTCCAAGTCTGTGCCATTGCATGAAGAGAAAAGAGCTACCAGCTCTTATCTCTTG  
AGAGTATCCTGCCATTCACCAATCTCAGACTTAGCTACACTCAAAGGAAATGCGTGTGCTGAGGCTACTCAATGCTTTCTCCTA  
CTCTGCCACTGAACCTCCATTGACTTGAACGTCCCACAGTGGCATGCCACAGTGAAGAGCAGGTCAGGCTCTCAGCACCAG  
TGTCTGGCCACATTCACCTGAAATCATTTGTCTTCAGAACATCAGAAAGGACCTGCAAGAGACCAGAAAGATTCACTAACTGTG  
ACTTTTCCCTCATAGAAGCAGGAGGGAGGTGAGACCTAGAGGCTGCAGGCTGCTCCCTTCTGTATTTTCCAGACATTTGGATGC  
AATGCTGTTCTAATTATCTTAT

### Kdm4dl knockout allele

CAGTTTTTCCATCCTGTGTACCTTCCAATTAGAAGGCAAGGGGCAGAGCCAGCGGTGGTGGTACACGCCTTTAATCCCAGCACTT  
GGGAGGCAGAGGCAGGCGGATTTCTGAGTTTGAGGCCAGCCTGCTCTACAAAGTGAGTTCCTGGACAGCCAGGGCTACACAGAGA  
AACACTTTCTCAAAAACAAAACAAAACAAAACAAAACAAAACAAAACAAAACAAAACAAAACAAAACAAAACAAAACAAAAGGAAGGGGT  
CTGAGCCTCCCCAATCCCATACAGTGACCAAGGGGGACCAAGCGTCAAGGACAGGATTCCTCAAGCAAGCTTCTGGAGCCTCT  
GGGATCCCTGTCGATCCTGTTAATGTTATAGCTGTGAACTACCCACAGGCTGTAGAATCTTGATAGGAGCCCCAAGTCTCCCT  
GCCGCTCACGGTGGTGGACATGAACTAAGTACATGCAGGATCACCTCCCAAGTCTGAGGCCATTTGGTCACAAGTGGATATTCCT  
GATCACTTGGACAAACAGGTGTCCAAGTTGTTGACAAATCAAACCTCCTTTGGATGATGCATTTGAGTCTCCTTTTGGTTTGGC  
CAGGATCTCCTTCAGAATTCATGCAGAAGGTGGATCTCCAAGTCTTGTGCCATTGCATGAAGAGAAAAGAGCTACCAGCTTTTA  
TCTTCTGAGAGTATCCTGCCATTCACCAATCTCAGACTTAGCTACACTCAAAGGAAATGCGTGTGCTGAGGCTACTCAATGCTT  
TCTCCTACTCTGCCACTGAACCTCCATTGACTTGAACGTCCCACAGTGGCATGCCACAGTGAAGAGCAGGTCAGGCTCTCAGC  
ACCCAGTGTCTGGCCACATTCACCTGAAATCATTTGTCTTCAGAACATCAGAAAGGACCTGCAAGAGACCAGAAAGATTCACT  
AACTGTGACTTTTCCCTCATAGAAGCAGGAGGGAGGTGAGACCTAGAGGCTGCAGGCTGCTCCCTTCTGTATTTTCCAGACATTT  
TGGATGCAATGCTGTTCTAATTATCTTAT

## Supplementary Fig. 2

### Kdm4d locus (around Exon 2 of the wild-type allele)

CACCCAGTAGCCTACAAGAGGAAAGAACCAGGTTCCAACGGAACATATTAGACCAAGGCTCCCTGACTGAGCTGCTGCCCTGAGT  
GCTGGCTCTGGGTTAGTCAGCAAGCCTAACAAAAGTTAGTCCCATCACATGCACAGAGGCTGTCAGGAGATTCGGCTCCATCACA  
GCCACAGCAAGTCTTCTTTATTTATTTTAAATCCCCTTCCCTCAATCCTGTGTGTATATTGGAGTTTGGTGTATACATTGAAGC  
TATGAAGACGAAGTCCACATGTGCTCAGAATCCAAATTGCAGCATAATGATATTTTCGTCCAACCAAAGAAGAGTTAATGATTTT  
GACAAATACATTGCTTACATGGAGTCCCAAGGGGCACACCGAGCTGGACTGGCCAAGGTCATCCCACCAAAGAATGGAGGGCCA  
GGCAGTCTTATGACAATATCAGCAACATCTTAATAGCAACTCCCCTGCAGCAAGTGGTCTCTGGGCAGGCAGGCGTGTTCACCCA  
ATACCATAAGAAGAAGAAAGGCATGACAGTGGGGGAGTACCGTGAGCTGGCCAACAGCAAAAAGTACCAGACCCCGCCACACCTG  
GATTTTGAAGATTTGGAGCGAAAATACTGGAAGAATCGCCTGTATGAGTCACCGATTTATGGTGTGACGTACAGCGGCTCCCTGT  
TTGATGGGAAGACTCAACAGTGAATGTGGGTACCTGGGAACAATTCAAGACCTATTGGAACAGGAATGTGGCATAGTGATTGA  
GGGCGTCAACACGCCCTACCTGTACTTTGGCATGTGGAAGACCACCTTTGCGTGGCACACGGAGGACATGGACCTGTACAGTATC  
AACTACCTACACTTTGGGCAGCCCAAGACCTGGTATGCTGTGCCCCCTGAGCATGGCAGGCGCCTGGAGCGCCTGGCCAGGGAAC  
TCTTCCCTGGCAGCTCCCAGGCTGCCAGGCCTTCCCTGAGGCACAAGGTGGCGCTCATCTCGCCCACTGTGCTTAAGGAGAATGG  
CATCCCCTTTGGTTCGCATCACCCAGGAGGCTGGGGAGTTCATGGTACCTTTCCCTATGGCTACCACGCGGGCTTCAACCATGGC  
TTCAACTGCGCAGAGGCCATCAATTTTGCCACCCCAAGGTGGATTGACTATGGCAAGGTGGCATCTCAGTGCAGCTGTGGGGAGG  
CCAGGGTGAGCTTCTCCATGGACGCCTTTGTGAGGATCTTGACGCTGAGCGATATGAACTGTGGAACGTGGCCAAGATCAGGC  
AGTTGTGGACCACACAGAGACTATGGTGTCTACCAGTCAGGAGCTCACCACCCGGCGGGTGACCAAAGCACCAGAAAAACTTGG  
GGCTTGAAAGCGTCTCCGGCTTCGCCAGGTCTCACGATCTCTTCTGCCTATAGCCACGGTAAGTAA

### Kdm4d knockout allele

CACCCAGTAGCCTACAAGAGGAAAGAACCAGGTTCCAACGGAACATATTAGACCAAGGCTCCCTGACTGAGCTGCTGCCCTGAGT  
GCTGGCTCTGGGTTAGTCAGCAAGCCTAACAAAAGTTAGTCCCATCACATGCACAGAGGCTGTCAGGAGATTCGGCTCCATCACA  
GCCACAGCAAGTCTTCTTTATTTATTTTAAATCCCCTTCCCTCAATCCTGTGTGTATATTGGAGTTTGGTGTATACATTGAAGC  
ACTGTGGAACGTGGCCAAGATCAGGCGATTGTGGACCACACAGAGACTATGGTGTCTACCAGTCAGGAGCTCACCACCCGGCGG  
GTGACCAAAGCACCAGAAAACTTGGGGCTTGAAGCGTCTCCGGCTTCGCCAGGTCTCACGATCTCTTCTGCCTATAGCCACGG  
TAAGTAA
